# Supplementary material for: Preserving earth’s flora in the 21st century: climate, biodiversity, and global change factors since the mid-1940s
Source: Frontiers journal article supplement (doi:10.3389/fcosc.2024.1383370), 2024-09-27
Supplement: Table_1.XLSX [file Table_1.XLSX]

## Sheet: Sheet1
Species scientific name	Red List Category
Acridocarpus staudtii	Critically Endangered
Afraegle asso	Endangered
Aframomum kamerunicum	Endangered
Aframomum kayserianum	Endangered
Aframomum kodmin	Endangered		N.B. Species scientific names in bold (font) are critically endangered and endangered plant species in Cameroon that showed consensus in both IUCN Red List and Earth’s Endangered Creatures database
Afroligusticum townsendii	Endangered
Afrothismia amietii	Critically Endangered
Afrothismia foertheriana	Critically Endangered
Afrothismia fungiformis	Endangered
Afrothismia gesnerioides	Critically Endangered
Afrothismia hydra	Endangered
Afrothismia korupensis	Critically Endangered
Afrothismia kupensis	Critically Endangered
Afrothismia pachyantha	Critically Endangered
Afrothismia pusilla	Critically Endangered
Afrothismia saingei	Endangered
Afrothismia winkleri	Critically Endangered
Afrotrewia kamerunica	Endangered
Agelanthus glaucoviridis	Endangered
Aldrovanda vesiculosa	Endangered
Allexis obanensis	Endangered
Allophylus oyemensis	Endangered
Allophylus ujori	Endangered
Amphimas tessmannii	Endangered
Ancistrocladus korupensis	Endangered
Ancistrorhynchus crystalensis	Endangered
Andropogon pusillus	Endangered
Angraecopsis lisowskii	Endangered
Angraecum angustum	Endangered
Angraecum curvipes	Endangered
Angraecum sanfordii	Endangered
Anisophyllea cuneata	Endangered
Anisotes zenkeri	Endangered
Anthonotha wijmacampensis	Endangered
Antidesma pachybotryum	Critically Endangered
Aporrhiza letestui	Endangered
Aporrhiza multijuga	Critically Endangered
Aporrhiza tessmannii	Endangered
Ardisia dom	Critically Endangered
Ardisia ebo	Critically Endangered
Ardisia etindensis	Critically Endangered
Ardisia koupensis	Endangered
Ardisia letouzeyi	Critically Endangered
Ardisia oligantha	Critically Endangered
Ardisia polyadenia	Critically Endangered
Ardisia schlechteri	Critically Endangered
Asclepias kamerunensis	Critically Endangered
Aulacocalyx camerooniana	Critically Endangered
Autranella congolensis	Endangered
Baissea ochrantha	Endangered
Baphia obanensis	Endangered
Begonia bonus-henricus	Endangered
Begonia furfuracea	Endangered
Begonia minuta	Critically Endangered
Begonia montis-elephantis	Critically Endangered
Begonia pelargoniiflora	Endangered
Begonia pseudoviola	Endangered
Begonia rubromarginata	Endangered
Begonia stellata	Critically Endangered
Beilschmiedia barensis	Endangered
Beilschmiedia cinnamomea	Endangered
Beilschmiedia congestiflora	Critically Endangered
Beilschmiedia congolana	Endangered
Beilschmiedia crassipes	Critically Endangered
Beilschmiedia grandibracteata	Endangered
Beilschmiedia hutchinsoniana	Endangered
Beilschmiedia jabassensis	Critically Endangered
Beilschmiedia kostermansiana	Critically Endangered
Beilschmiedia letouzeyi	Endangered
Beilschmiedia myrciifolia	Endangered
Beilschmiedia ndongensis	Critically Endangered
Beilschmiedia nitida	Endangered
Beilschmiedia papyracea	Critically Endangered
Beilschmiedia preussii	Critically Endangered
Beilschmiedia preussioides	Endangered
Beilschmiedia sessilifolia	Endangered
Beilschmiedia staudtii	Endangered
Beilschmiedia wilczekii	Endangered
Beilschmiedia zahnii	Critically Endangered
Belonophora ongensis	Critically Endangered
Berlinia korupensis	Critically Endangered
Brachystephanus kupeensis	Critically Endangered
Bulbophyllum dolabriforme	Endangered
Bulbophyllum filiforme	Critically Endangered
Bulbophyllum jaapii	Critically Endangered
Bulbophyllum micropetalum	Endangered
Bulbophyllum modicum	Endangered
Bulbophyllum subligaculiferum	Endangered
Bulbophyllum summerhayesianum	Endangered
Bulbophyllum vanum	Endangered
Calvoa stenophylla	Endangered
Cassipourea acuminata	Endangered
Cassipourea alternifolia	Endangered
Cassipourea dinklagei	Endangered
Cassipourea korupensis	Critically Endangered
Cassipourea ndambiana	Endangered
Ceropegia exilis	Endangered
Ceropegia ledermannii	Endangered
Chassalia laikomensis	Critically Endangered
Chlamydocardia subrhomboidea	Endangered
Chlamydophytum aphyllum	Endangered
Chlorophytum altum	Endangered
Chlorophytum benuense	Endangered
Chlorophytum camporum	Endangered
Chlorophytum petrophilum	Critically Endangered
Chlorophytum staudtii	Endangered
Cincinnobotrys letouzeyi	Endangered
Clutia kamerunica	Endangered
Cnestis macrophylla	Endangered
Coffea arabica	Endangered
Coffea bakossii	Endangered
Coffea charrieriana	Critically Endangered
Coffea fotsoana	Critically Endangered
Coffea heterocalyx	Critically Endangered
Coffea leonimontana	Critically Endangered
Cola cecidiifolia	Endangered
Cola etugei	Critically Endangered
Cola hypochrysea	Endangered
Cola kodminensis	Critically Endangered
Cola mamboana	Endangered
Cola metallica	Critically Endangered
Cola praeacuta	Endangered
Cola suboppositifolia	Endangered
Cola zemagoana	Endangered
Coleochloa domensis	Critically Endangered
Combretum echirense	Endangered
Commelina zenkeri	Endangered
Cordia stenoloba	Endangered
Costus kupensis	Endangered
Crateranthus cameroonensis	Critically Endangered
Crateranthus congolensis	Endangered
Craterispermum rumpianum	Critically Endangered
Craterosiphon montanum	Endangered
Crossandra obanensis	Endangered
Crotalaria mentiens	Endangered
Croton dispar	Endangered
Crotonogyne impedita	Critically Endangered
Crudia bibundina	Critically Endangered
Cryptosepalum korupense	Endangered
Culcasia bosii	Endangered
Cyathula fernando-poensis	Endangered
Cyclantheropsis occidentalis	Endangered
Cyperus microcristatus	Critically Endangered
Cyphostemma camerounense	Endangered
Cyphostemma leucotrichum	Endangered
Dactyladenia cinerea	Endangered
Dactyladenia johnstonei	Critically Endangered
Dactyladenia mannii	Endangered
Dalbergia nervosa	Endangered
Dalbergia semiapplanata	Endangered
Daniellia glandulosa	Critically Endangered
Deinbollia dasybotrys	Endangered
Deinbollia macrantha	Critically Endangered
Deinbollia macroura	Endangered
Deinbollia mezilii	Endangered
Deinbollia onanae	Endangered
Deinbollia pycnophylla	Endangered
Deinbollia unijuga	Endangered
Deschampsia mildbraedii	Endangered
Diaphananthe dorotheae	Endangered
Diaphananthe lanceolata	Endangered
Dichapetalum korupinum	Critically Endangered
Dichapetalum letouzeyi	Critically Endangered
Dichapetalum potamophilum	Endangered
Dicraeanthus zehnderi	Critically Endangered
Didelotia korupensis	Endangered
Digitaria adamaouensis	Endangered
Diospyros alboflavescens	Endangered
Diospyros korupensis	Endangered
Diospyros onanae	Endangered
Dischistocalyx champluvieranus	Endangered
Dischistocalyx rivularis	Critically Endangered
Disperis kamerunensis	Critically Endangered
Disperis mildbraedii	Endangered
Distylodon sonkeanum	Critically Endangered
Dolichos reptans	Endangered
Dombeya ledermannii	Critically Endangered
Dovyalis cameroonensis	Critically Endangered
Dracaena kupensis	Endangered
Drypetes burnleyae	Endangered
Drypetes magnistipula	Endangered
Drypetes moliwensis	Critically Endangered
Drypetes tessmanniana	Critically Endangered
Duguetia dilabens	Endangered
Englerodendron korupense	Endangered
Englerodendron leptorrhachis	Critically Endangered
Englerophytum libenii	Endangered
Epistemma decurrens	Endangered
Eragrostis raynaliana	Endangered
Eremospatha barendii	Critically Endangered
Eriocaulon stipantepalum	Endangered
Eriosema adamaouense	Critically Endangered
Eugenia buchholzii	Critically Endangered
Eugenia gilgii	Critically Endangered
Eugenia kameruniana	Critically Endangered
Ficus oresbia	Endangered
Floscopa mannii	Endangered
Gardenia epiphytica	Endangered
Gastrodia africana	Endangered
Genyorchis macrantha	Endangered
Gilbertiodendron newberyi	Endangered
Gilbertiodendron quadrifolium	Critically Endangered
Gilbertiodendron zenkeri	Endangered
Globulostylis leniochlamys	Critically Endangered
Gluema korupensis	Endangered
Gnidia bambutana	Endangered
Guibourtia pellegriniana	Endangered
Guibourtia tessmannii	Endangered
Habenaria alinae	Critically Endangered
Habenaria batesii	Endangered
Habenaria bosseriana	Critically Endangered
Habenaria egregia	Endangered
Habenaria linguiformis	Endangered
Habenaria maitlandii	Endangered
Habenaria obovata	Endangered
Habenaria phantasma	Endangered
Halleorchis aspidogynoides	Endangered
Heckeldora ledermannii	Endangered
Helixanthera periclymenoides	Critically Endangered
Hexalobus bussei	Endangered
Hibiscus grewioides	Endangered
Homalium hypolasium	Endangered
Hoplestigma pierreanum	Critically Endangered
Hugonia gabunensis	Endangered
Hygrophila mediatrix	Endangered
Hypolytrum pseudomapanioides	Endangered
Hypolytrum subcompositus	Critically Endangered
Hypolytrum unispicatum	Endangered
Impatiens etindensis	Endangered
Impatiens frithii	Endangered
Impatiens gongolana	Endangered
Impatiens grandisepala	Critically Endangered
Impatiens letouzeyi	Endangered
Inversodicraea achoundongii	Critically Endangered
Inversodicraea annithomae	Endangered
Inversodicraea bosii	Endangered
Inversodicraea ebo	Critically Endangered
Inversodicraea eladii	Critically Endangered
Inversodicraea ntemensis	Critically Endangered
Inversodicraea senei	Critically Endangered
Inversodicraea tchouti	Critically Endangered
Isolona pleurocarpa	Endangered
Ixora batesii	Endangered
Ixora delicatula	Endangered
Ixora synactica	Endangered
Julbernardia letouzeyi	Endangered
Justicia gigantophylla	Endangered
Justicia leucoxiphus	Endangered
Justicia telloensis	Endangered
Justicia tenuipes	Endangered
Keetia bakossiorum	Critically Endangered
Kniphofia reflexa	Endangered
Korupodendron songweanum	Endangered
Kupea martinetugei	Critically Endangered
Kupeantha ebo	Critically Endangered
Kupeantha fosimondi	Critically Endangered
Kupeantha kupensis	Endangered
Kupeantha yabassi	Critically Endangered
Kylicanthe bueae	Endangered
Landolphia uniflora	Endangered
Lecaniodiscus punctatus	Endangered
Lecomtedoxa plumosa	Endangered
Ledermanniella batangensis	Critically Endangered
Ledermanniella keayi	Critically Endangered
Ledermanniella letouzeyi	Endangered
Ledermanniella linearifolia	Endangered
Ledermanniella monandra	Critically Endangered
Ledermanniella onanae	Endangered
Ledermanniella pollardiana	Critically Endangered
Ledermanniella pusilla	Endangered
Ledermanniella raynaliorum	Endangered
Ledermanniella sanagaensis	Critically Endangered
Ledermanniella thalloidea	Endangered
Ledermanniella variabilis	Endangered
Leersia triandra	Endangered
Lefebvrea camerunensis	Endangered
Leiothylax quangensis	Endangered
Leptoderris ledermannii	Endangered
Leptoderris macrothyrsa	Endangered
Leptonychia subtomentosa	Endangered
Liparis ascendens	Endangered
Liparis goodyeroides	Critically Endangered
Liparis gracilenta	Endangered
Liparis kamerunensis	Critically Endangered
Liparis letouzeyana	Critically Endangered
Loeseneriella camerunica	Endangered
Macropodiella pellucida	Endangered
Magnistipula conrauana	Endangered
Magnistipula cuneatifolia	Endangered
Magnistipula multinervia	Critically Endangered
Malouetia barbata	Endangered
Manilkara lososiana	Endangered
Manilkara zenkeri	Endangered
Manniella cypripedioides	Endangered
Mapania raynaliana	Endangered
Marantochloa mildbraedii	Endangered
Memecylon alipes	Endangered
Memecylon amshoffiae	Endangered
Memecylon bakossiense	Critically Endangered
Memecylon biokoense	Endangered
Memecylon fugax	Endangered
Memecylon korupense	Endangered
Memecylon kupeanum	Endangered
Memecylon mamfeanum	Endangered
Memecylon simulans	Endangered
Mendoncia camerounensis	Endangered
Microberlinia bisulcata	Endangered
Microcos magnifica	Endangered
Millettia conraui	Endangered
Millettia coruscans	Endangered
Millettia laurentii	Endangered
Mimusops dodensis	Critically Endangered
Mischogyne gabonensis	Endangered
Mitriostigma monocaule	Critically Endangered
Mitrostigma barteri	Endangered
Momordica camerounensis	Endangered
Momordica obtusisepala	Critically Endangered
Monanthotaxis couvreurii	Critically Endangered
Monanthotaxis dielsiana	Endangered
Monopetalanthus hedinii	Critically Endangered
Multidentia saxicola	Endangered
Najas hagerupii	Endangered
Namataea simplicifolia	Endangered
Neolemonniera ogouensis	Endangered
Neoschumannia kamerunensis	Critically Endangered
Nerophila clandestina	Endangered
Neuropeltis eladii	Endangered
Neuropeltis laxiflora	Endangered
Neuropeltis pseudovelutina	Critically Endangered
Newtonia camerunensis	Critically Endangered
Newtonia scandens	Critically Endangered
Ocotea ikonyokpe	Critically Endangered
Octoknema bakossiensis	Endangered
Octoknema dinklagei	Endangered
Okoubaka aubrevillei	Endangered
Ormocarpum klainei	Endangered
Ossiculum aurantiacum	Endangered
Ostryocarpus zenkerianus	Critically Endangered
Oxyanthus okuensis	Critically Endangered
Oxygyne duncanii	Critically Endangered
Oxygyne triandra	Critically Endangered
Pachycarpus medusonema	Endangered
Palisota ebo	Critically Endangered
Palisota flagelliflora	Endangered
Pancovia polyantha	Critically Endangered
Pararistolochia preussii	Critically Endangered
Pavetta brachycalyx	Endangered
Pavetta brachysiphon	Critically Endangered
Pavetta grossissima	Endangered
Pavetta kupensis	Critically Endangered
Pavetta laxa	Critically Endangered
Pavetta longistyla	Critically Endangered
Pavetta muiriana	Endangered
Pavetta namatae	Critically Endangered
Pavetta robusta	Endangered
Pavetta rubentifolia	Critically Endangered
Pavetta tenuissima	Endangered
Peperomia dusenii	Critically Endangered
Peperomia kamerunana	Endangered
Pericopsis elata	Endangered
Petchia africana	Endangered
Phragmanthera talbotiorum	Endangered
Phyllanthus aspersus	Critically Endangered
Phyllanthus caesiifolius	Critically Endangered
Phyllanthus caligatus	Endangered
Phyllanthus dusenii	Endangered
Phyllanthus kidna	Critically Endangered
Phyllanthus nyale	Critically Endangered
Phyllanthus raynalii	Endangered
Physacanthus talbotii	Endangered
Piptostigma longepilosum	Endangered
Piptostigma submontanum	Endangered
Placodiscus caudatus	Endangered
Placodiscus turbinatus	Endangered
Plagiosiphon discifer	Endangered
Platycoryne alinae	Endangered
Platysepalum scaberulum	Critically Endangered
Plectranthus dissitiflorus	Critically Endangered
Polycarpaea garuensis	Endangered
Polycarpaea rheophytica	Endangered
Polystachya anthoceros	Endangered
Polystachya bamendae	Endangered
Polystachya cooperi	Endangered
Polystachya farinosa	Endangered
Polystachya geniculata	Endangered
Polystachya kornasiana	Endangered
Polystachya kupensis	Critically Endangered
Polystachya lejolyana	Endangered
Polystachya principia	Endangered
Polystachya stodolnyi	Endangered
Polystachya superposita	Endangered
Polystachya victoriae	Critically Endangered
Prioria balsamifera	Endangered
Pristimera biholongii	Critically Endangered
Pristimera breteleri	Critically Endangered
Pseudohydrosme ebo	Critically Endangered
Psychotria asterogramma	Endangered
Psychotria bakossiensis	Endangered
Psychotria bimbiensis	Critically Endangered
Psychotria campoensis	Endangered
Psychotria cheekii	Endangered
Psychotria conica	Endangered
Psychotria densinervia	Endangered
Psychotria elephantina	Endangered
Psychotria lophocarpa	Endangered
Psychotria microthyrsa	Critically Endangered
Psychotria minimicalyx	Critically Endangered
Psychotria moliwensis	Critically Endangered
Psychotria moseskemei	Critically Endangered
Psychotria njumei	Endangered
Psychotria retrofracta	Endangered
Psychotria retrorsipilis	Critically Endangered
Psychotria torrenticola	Critically Endangered
Psychotria yaoundensis	Critically Endangered
Psydrax bridsoniana	Endangered
Pterocarpus erinaceus	Endangered
Pterocarpus zenkeri	Endangered
Pyrenacantha cordicula	Endangered
Pyrenacantha grandifolia	Critically Endangered
Rhaphidophora bogneri	Critically Endangered
Rhaphiostylis elegans	Endangered
Rhaphiostylis ovatifolia	Endangered
Rhaphiostylis poggei	Critically Endangered
Rhaphiostylis subsessilifolia	Endangered
Rhaptopetalum breteleri	Critically Endangered
Rhaptopetalum cheekii	Endangered
Rhaptopetalum depressum	Endangered
Rhaptopetalum sessilifolium	Endangered
Rhipidoglossum ochyrae	Endangered
Rhynchosia ledermannii	Critically Endangered
Rinorea faurei	Critically Endangered
Rinorea fausteana	Endangered
Rinorea simoneae	Endangered
Rinorea villiersii	Critically Endangered
Rothmannia ebamutensis	Endangered
Sabicea bullata	Endangered
Sabicea cameroonensis	Endangered
Sabicea cruciata	Endangered
Sabicea schaeferi	Endangered
Sabicea trigemina	Critically Endangered
Sabicea xanthotricha	Endangered
Salacia conraui	Critically Endangered
Salacia eurypetala	Endangered
Sarcophrynium villosum	Endangered
Saxicolella marginalis	Critically Endangered
Scleria afroreflexa	Endangered
Scleria sheilae	Critically Endangered
Sclerochiton preussii	Endangered
Sericanthe lowryana	Endangered
Simirestis staudtii	Critically Endangered
Sporobolus montanus	Endangered
Stachyanthus cuneatus	Critically Endangered
Staurogyne pseudocapitata	Endangered
Stelechantha arcuata	Critically Endangered
Stenandrium thomense	Endangered
Stereospermum zenkeri	Critically Endangered
Strombosia gossweileri	Endangered
Strychnos canthioides	Endangered
Synsepalum batesii	Critically Endangered
Synsepalum brenanii	Critically Endangered
Talbotiella bakossiensis	Endangered
Talbotiella breteleri	Endangered
Talbotiella ebo	Endangered
Talbotiella velutina	Endangered
Telfairia batesii	Endangered
Ternstroemia cameroonensis	Critically Endangered
Tessmannia korupensis	Endangered
Testulea gabonensis	Endangered
Thecacoris lancifolia	Endangered
Thunbergia rufescens	Endangered
Thyrsosalacia pararacemosa	Endangered
Tieghemella africana	Endangered
Tieghemella heckelii	Endangered
Tiliacora lehmbachii	Endangered
Tiliacora odorata	Endangered
Tricalysia achoundongiana	Endangered
Tricalysia elmar	Endangered
Tricalysia ferorum	Endangered
Tricalysia lejolyana	Endangered
Trichoscypha hallei	Endangered
Trichostachys petiolata	Endangered
Triclisia lanceolata	Endangered
Triclisia macrophylla	Critically Endangered
Trifolium gillettianum	Critically Endangered
Tristemma camerunense	Endangered
Uvariopsis dicaprio	Critically Endangered
Uvariopsis korupensis	Endangered
Uvariopsis submontana	Endangered
Vangueriella letestui	Endangered
Vangueriella zenkeri	Endangered
Vepris adamaouae	Endangered
Vepris araliopsioides	Endangered
Vepris bali	Critically Endangered
Vepris heterophylla	Endangered
Vepris letouzeyi	Endangered
Vepris mbamensis	Endangered
Vepris montisbambutensis	Critically Endangered
Vepris onanae	Endangered
Vepris oubanguiensis	Endangered
Vepris zapfackii	Critically Endangered
Vigna desmodioides	Endangered
Vigna laurentii	Endangered
Virectaria salicoides	Critically Endangered
Vitex yaundensis	Critically Endangered
Warneckea austro-occidentalis	Endangered
Warneckea mangrovensis	Endangered
Warneckea ngutiensis	Critically Endangered
Warneckea wildeana	Endangered
Winklerella dichotoma	Critically Endangered
Xylopia calva	Endangered
Xylopia paniculata	Endangered
Zehnderia microgyna	Critically Endangered
